# Supplementary material for: Effects of Electromyography Bridge on Upper Limb Motor Functions in Stroke Participants: An Exploratory Randomized Controlled Trial
Source: MDPI journal article supplement (doi:10.3390/brainsci12070870), 2022-06-30
Supplement: s1 [file s1]

## Supplementary Material

**Table S1. Demographic and Clinical Information for Patients.**

| Patient No. | Sex/Age,<br>year | Stroke Onset,<br>month | Group | Hemiplegia<br>side | Type of<br>Stroke | HAMD |
|-------------|------------------|------------------------|-------|--------------------|-------------------|------|
| 45          | F/72             | 9                      | EMGB  | L                  | hemorrhagic       | 4    |
| 47          | F/70             | 1                      | EMGB  | L                  | ischemic          | 0    |
| 51          | F/73             | 4                      | EMGB  | L                  | ischemic          | 0    |
| 54          | M/43             | 1                      | EMGB  | R                  | hemorrhagic       | 1    |
| 53          | F/68             | 1                      | EMGB  | L                  | ischemic          | 9    |
| 39          | F/73             | 9                      | EMGB  | L                  | hemorrhagic       | 1    |
| 56          | F/51             | 6                      | EMGB  | R                  | hemorrhagic       | 0    |
| 60          | M/25             | 1                      | EMGB  | L                  | hemorrhagic       | 10   |
| 46          | M/55             | 1                      | EMGB  | L                  | ischemic          | 0    |
| 59          | M/51             | 1                      | EMGB  | L                  | hemorrhagic       | 18   |
| 41          | M/38             | 5                      | EMGB  | L                  | hemorrhagic       | 0    |
| 38          | M/35             | 5                      | EMGB  | R                  | hemorrhagic       | 1    |
| 48          | M/68             | 8                      | EMGB  | L                  | hemorrhagic       | 2    |
| 55          | M/37             | 1                      | EMGB  | R                  | hemorrhagic       | 0    |
| 42          | M/55             | 1                      | NMES  | L                  | hemorrhagic       | 3    |
| 58          | F/73             | 1                      | NMES  | L                  | hemorrhagic       | 2    |
| 52          | F/51             | 1                      | NMES  | L                  | ischemic          | 18   |
| 43          | M/52             | 1                      | NMES  | R                  | hemorrhagic       | 10   |
| 44          | F/35             | 4                      | NMES  | R                  | hemorrhagic       | 0    |
| 50          | M/60             | 1                      | NMES  | L                  | ischemic          | 0    |
| 57          | M/56             | 2                      | NMES  | L                  | hemorrhagic       | 11   |
| 40          | M/49             | 2                      | NMES  | R                  | hemorrhagic       | 0    |

M: male; F: female; EMGB: electromyography bridge; NMES: neuromuscular electrical stimulation; HAMD: Hamilton Rating Scale for Depression.

**Table S2. Demographic and clinical information for Patients (long course Removed).**

| Patient No. | Sex/Age,<br>year | Stroke Onset,<br>month | Group | Paralyzed<br>Side | Type of<br>Stroke | HAMD |
|-------------|------------------|------------------------|-------|-------------------|-------------------|------|
| 47          | F/70             | 1                      | EMGB  | L                 | ischemic          | 0    |
| 51          | F/73             | 4                      | EMGB  | L                 | ischemic          | 0    |
| 54          | M/43             | 1                      | EMGB  | R                 | hemorrhagic       | 1    |
| 53          | F/68             | 1                      | EMGB  | L                 | ischemic          | 9    |
| 60          | M/25             | 1                      | EMGB  | L                 | hemorrhagic       | 10   |
| 46          | M/55             | 1                      | EMGB  | L                 | ischemic          | 0    |
| 59          | M/51             | 1                      | EMGB  | L                 | hemorrhagic       | 18   |
| 48          | M/68             | 8                      | EMGB  | L                 | hemorrhagic       | 2    |
| 55          | M/37             | 1                      | EMGB  | R                 | hemorrhagic       | 0    |
| 42          | M/55             | 1                      | NMES  | L                 | hemorrhagic       | 3    |
| 58          | F/73             | 1                      | NMES  | L                 | hemorrhagic       | 2    |
| 52          | F/51             | 1                      | NMES  | L                 | ischemic          | 18   |
| 43          | M/52             | 1                      | NMES  | R                 | hemorrhagic       | 10   |
| 44          | F/35             | 4                      | NMES  | R                 | hemorrhagic       | 0    |
| 50          | M/60             | 1                      | NMES  | L                 | ischemic          | 0    |
| 57          | M/56             | 2                      | NMES  | L                 | hemorrhagic       | 11   |
| 40          | M/49             | 2                      | NMES  | R                 | hemorrhagic       | 0    |

M: male; F: female; EMGB: electromyography bridge; NMES: neuromuscular electrical stimulation; HAMD: Hamilton Rating Scale for Depression.

**Table S3 . Clinical Characteristics of All the Patients in Both Groups.**

|                                  | <b>EMGB group (n=14)</b> | <b>NMES group (n=8)</b> | <b><i>P value</i></b> |
|----------------------------------|--------------------------|-------------------------|-----------------------|
| <b>Age</b>                       | 54.21±16.60              | 53.88±10.70             | 0.954                 |
| <b>Sex, <i>n</i> (%)</b>         |                          |                         |                       |
| <b>Male</b>                      | 8(57.1)                  | 5(62.5)                 | 1                     |
| <b>Female</b>                    | 6(42.9)                  | 3(37.5)                 |                       |
| <b>Stroke type, <i>n</i> (%)</b> |                          |                         |                       |
| <b>Infarction</b>                | 4(28.6)                  | 2(0.25)                 | 1                     |
| <b>Hemorrhage</b>                | 10(71.4)                 | 6(0.75)                 |                       |
| <b>Paralyzed side</b>            |                          |                         |                       |
| <b>Left</b>                      | 10(71.4)                 | 5(62.5)                 | 1                     |
| <b>Right</b>                     | 4(28.6)                  | 3(37.5)                 |                       |
| <b>HAMD</b>                      | 3.29±5.38                | 5.50±6.72               | 0.406                 |
| <b>Stroke onset, month</b>       | 3.79±3.21                | 1.63±1.06               | 0.034                 |

Abbreviations: EMGB, electromyography bridge; NMES, neuromuscular electrical stimulation; HAMD, Hamilton Rating Scale for Depression.

\*Values are presented as the number of patients (n) or mean±standard deviation.

Significance difference at  $p < 0.05$ .
